# Supplementary material for: Supported cobalt catalysts for the selective hydrogenation of ethyl levulinate to various chemicals
Source: Royal Society of Chemistry journal article supplement (doi:10.1039/c8ra01316k), 2018-01-01
Supplement: c8ra01316k1.pdf [file c8ra01316k1.pdf]

**Electronic Supplementary Information**

**Supported cobalt catalysts for selective hydrogenation of ethyl levulinate to various chemicals**

Youliang Cen<sup>a,b</sup>, Shanhui Zhu<sup>a,\*</sup>, Jing Guo<sup>a,b</sup>, Jiachun Chai<sup>a,b</sup>, Weiyong Jiao<sup>a</sup>, Jianguo Wang<sup>a</sup>,  
Weibin Fan<sup>a,\*</sup>

<sup>a</sup>State Key Laboratory of Coal Conversion, Institute of Coal Chemistry, Chinese Academy of Sciences, Taiyuan 030001, PR China

<sup>b</sup>University of Chinese Academy of Sciences, Beijing 100049, PR China

\*Corresponding authors.

E-mail addresses: [zhushanhui@sxicc.ac.cn](mailto:zhushanhui@sxicc.ac.cn) (S. Zhu); [fanwb@sxicc.ac.cn](mailto:fanwb@sxicc.ac.cn) (W. Fan).

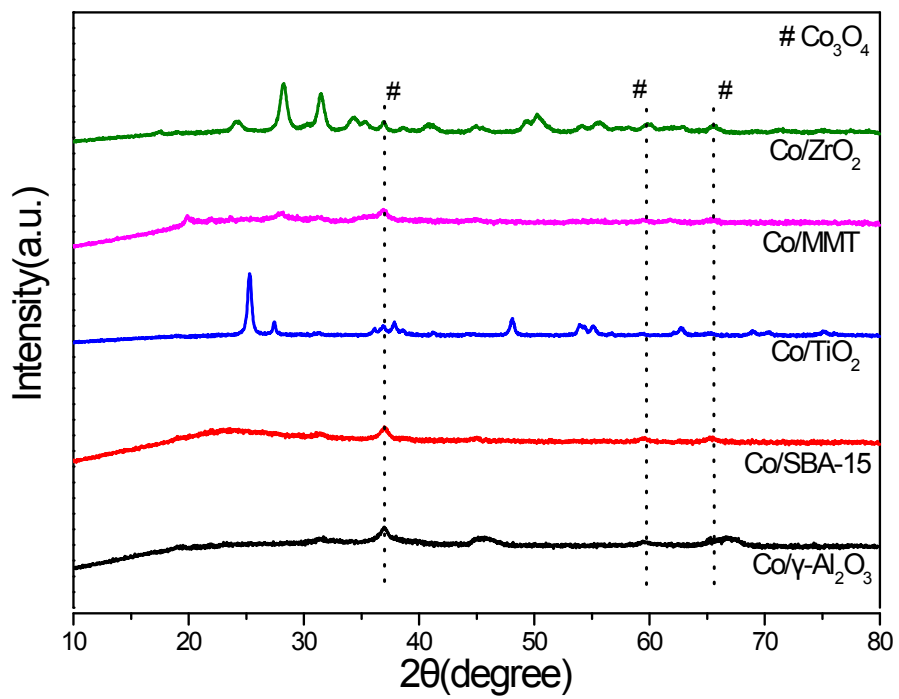

Fig. S1 XRD patterns of the as-prepared Co-based catalysts.

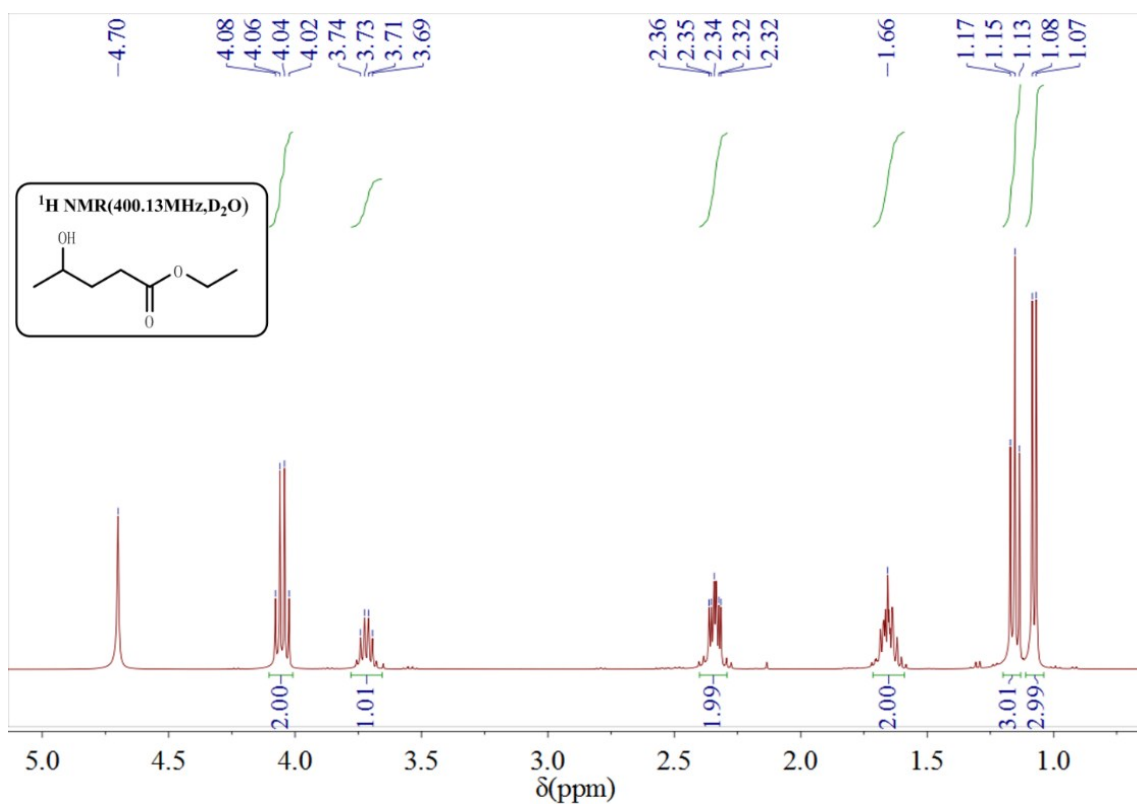

**Fig. S2** <sup>1</sup>H NMR spectrum of highly pure EHP obtained over Ru/TiO<sub>2</sub> at room temperature without using solvent.

<sup>1</sup>H NMR (400.13 MHz, D<sub>2</sub>O)  $\delta = 4.08-4.02$  (m, 2H),  $\delta = 3.74-3.69$  (m, 1H),  $\delta = 2.36-2.32$  (m, 2H),  $\delta=1.66$  (m, 2H),  $\delta=1.17-1.13$  (t, 3H),  $\delta = 1.08-1.07$  (d, 3H).

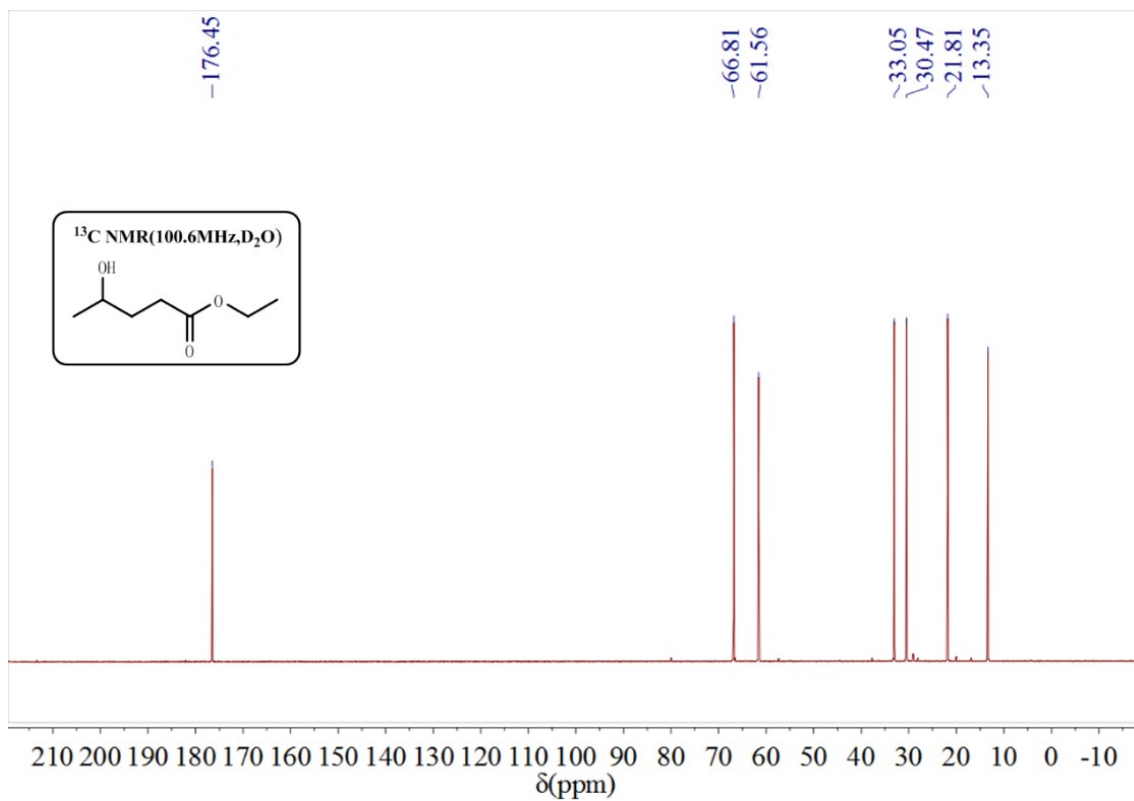

**Fig. S3** <sup>13</sup>C NMR spectrum of highly pure EHP obtained over Ru/TiO<sub>2</sub> at room temperature without using solvent.

<sup>13</sup>C NMR (100.6 MHz, D<sub>2</sub>O)  $\delta$  = 176.45, 66.81, 61.56, 33.05, 30.47, 21.81, 13.35.

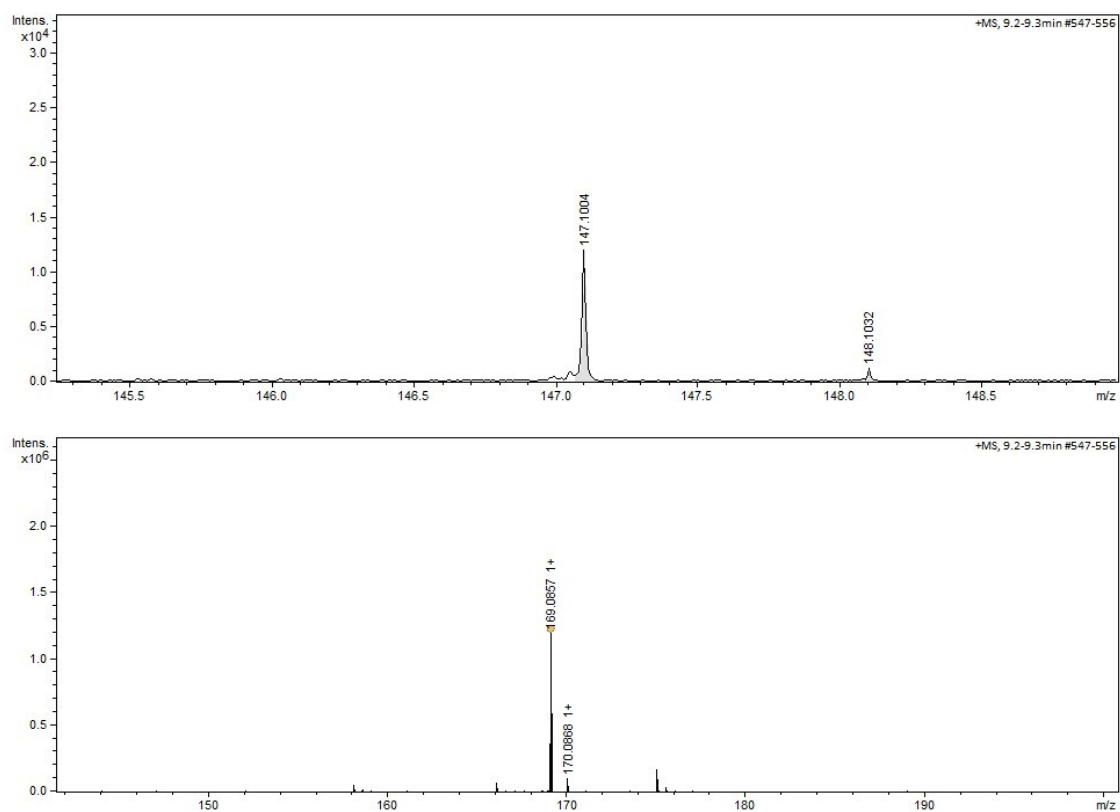

**Fig. S4** Positive-ion ESI mass spectrum of product obtained over Co/SBA-15 in the hydrogenation of EL.

EHP : ESI-MS  $m/z$ : 147.1004  $[(M+H)^+]$ ,  $C_7H_{15}O_3$ ,  $m/z$ : 169.0857  $[(M+Na)^+]$ ,  $C_7H_{14}O_3Na$ , Anal.

Calcd for  $C_7H_{14}O_3$ : 146.1684. The  $Na^+$  came from the standard calibration sodium formate of mass spectrometer.

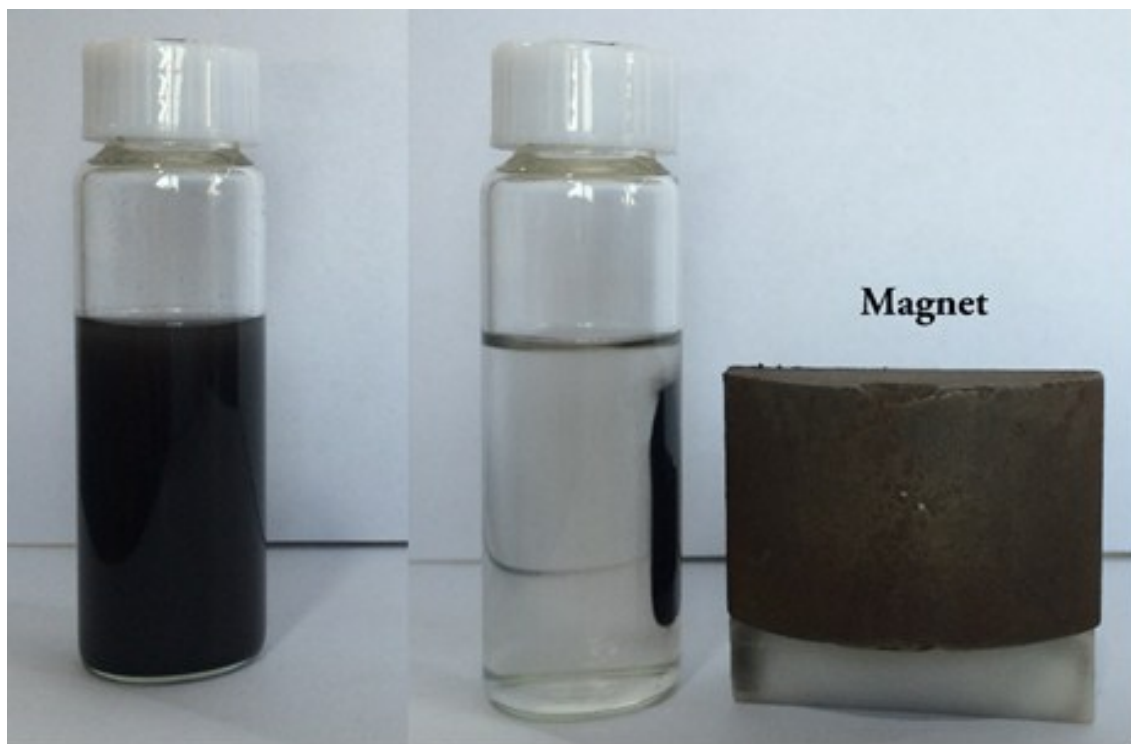

**Fig. S5** Magnetic separation of Co/ZrO<sub>2</sub> from reaction liquid by an external magnet.

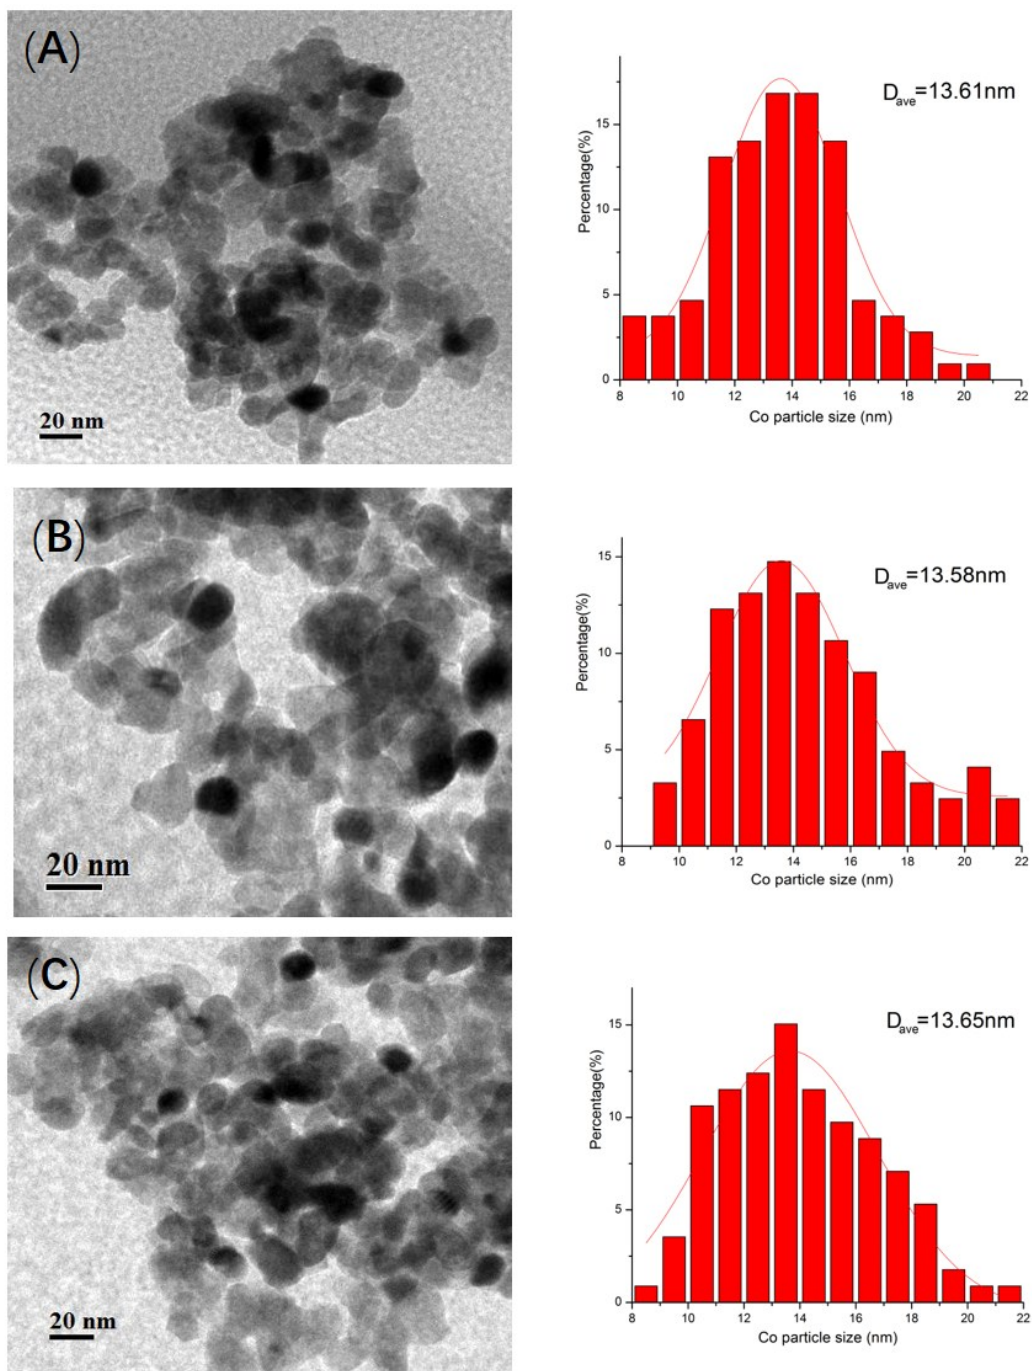

**Fig. S6** TEM images and Co particle size distributions of (A) Co/ZrO<sub>2</sub> after 1 recycle, (B) Co/ZrO<sub>2</sub> after 2 recycles, and (C) Co/ZrO<sub>2</sub> after 3 recycles.

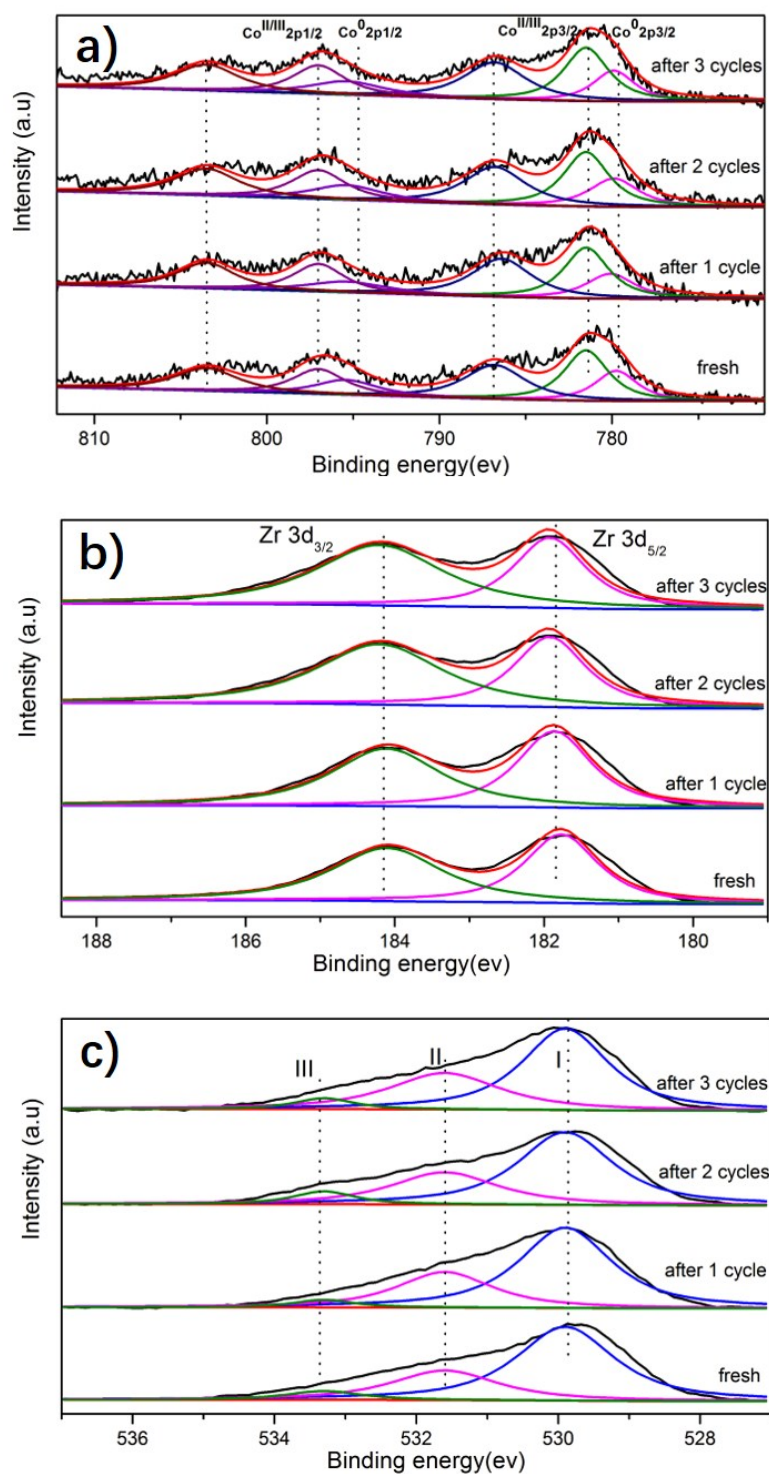

**Fig. S7** (a) Co 2p, (b) Zr 3d and (c) O 1s XPS spectra of fresh and used Co/ZrO<sub>2</sub> catalysts.



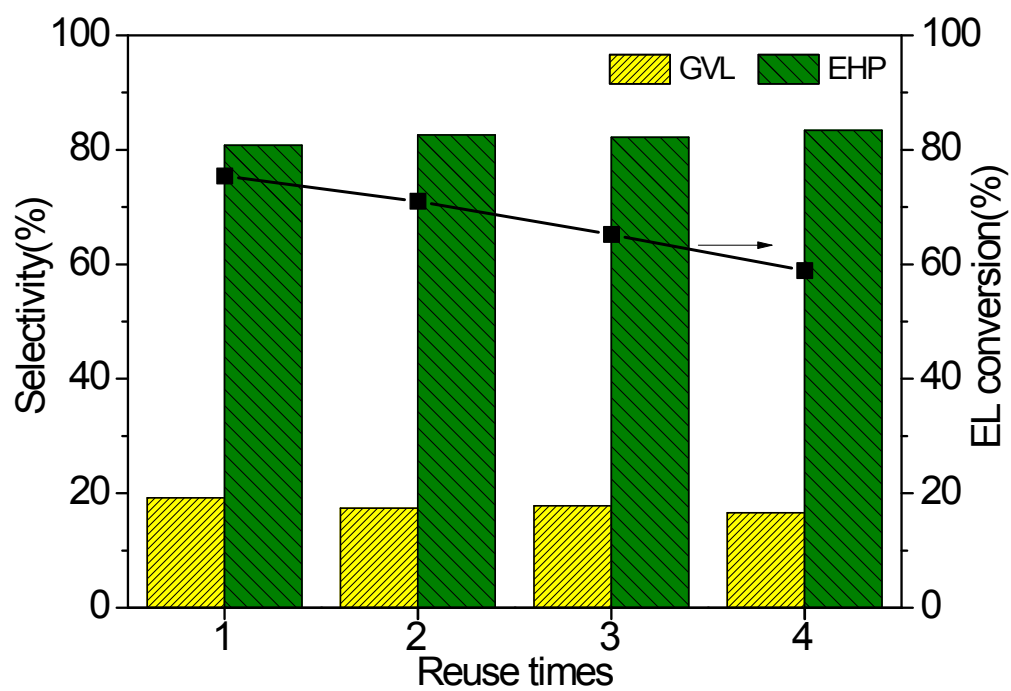

**Fig. S8** Catalytic results obtained over Co/ZrO<sub>2</sub> within first four repeated runs without regeneration

(reaction conditions: 17.4 mmol EL, 15 mL 1,4-dioxane, 140 °C; 4 MPa H<sub>2</sub>, 1.5 h and 0.1 g Co/ZrO<sub>2</sub>).

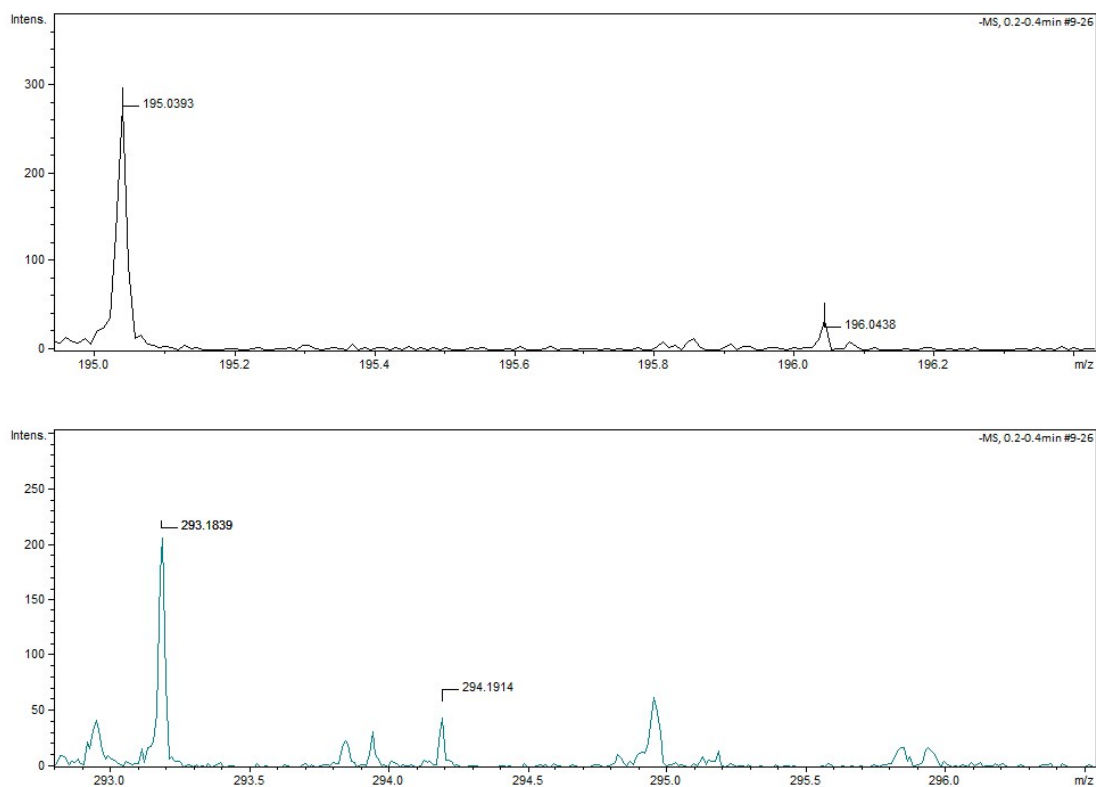

**Fig. S9** Negative-ion ESI mass spectrum of the MIBK-extracted organic species occluded in used catalyst.

EHP : ESI-MS m/z: 195.0393 [(M-H)<sup>-</sup>, C<sub>10</sub>H<sub>11</sub>O<sub>4</sub>], Anal. Calcd for C<sub>10</sub>H<sub>12</sub>O<sub>4</sub>: 196.074. m/z: 293.1839

[(M-H)<sup>-</sup>, C<sub>15</sub>H<sub>17</sub>O<sub>6</sub>], Anal. Calcd for C<sub>15</sub>H<sub>18</sub>O<sub>6</sub>: 294.111.

**Table S1** Catalytic results of Co/ZrO<sub>2</sub> and reported heterogeneous catalysts for the hydrogenation of LA and its ester to GVL.

| Catalyst                             | Substrate       | Reaction conditions                    | T[°C] | Conv.<br>[%] | Yield<br>[%]      | Productivity <sup>a</sup><br>[mol <sub>GVL</sub> g <sub>metal</sub> <sup>-1</sup> h <sup>-1</sup> ] | Ref       |
|--------------------------------------|-----------------|----------------------------------------|-------|--------------|-------------------|-----------------------------------------------------------------------------------------------------|-----------|
| 5% Ru/C                              | LA              | 1,4-dioxane, H <sub>2</sub> (12 bar)   | 130   | 99           | 96                | 1.20                                                                                                | 1         |
| 5% Ru/TiO <sub>2</sub>               | LA              | ethanol/water, H <sub>2</sub> (12 bar) | 130   | 81           | 71                | 0.92                                                                                                | 1         |
| 5% Ru/C                              | LA              | solvent-free, H <sub>2</sub> (12 bar)  | 190   | 100          | 100               | 5.20                                                                                                | 1         |
| 3Pd-10Nb-AC                          | EL              | water, H <sub>2</sub> (5 bar)          | 100   | 87           | 81                | 0.54                                                                                                | 2         |
| Raney Ni                             | EL              | 2-PrOH, Ar                             | r.t.  | -            | 87                | 4.4×10 <sup>-3</sup>                                                                                | 3         |
| Cu-Fe                                | LA              | water, H <sub>2</sub> (70 bar)         | 200   | 99           | 90                | 0.038                                                                                               | 4         |
| Cu-WO <sub>3</sub> /ZrO <sub>2</sub> | LA              | ethanol, H <sub>2</sub> (50 bar)       | 200   | 100          | 87                | 0.021                                                                                               | 5         |
| Cu-ZrO <sub>2</sub>                  | ML <sup>b</sup> | methanol, H <sub>2</sub> (34 bar)      | 200   | 95           | 87                | 0.035                                                                                               | 6         |
| Co                                   | EL              | solvent free, H <sub>2</sub> (33 bar)  | 130   | 99           | 94                | 0.022                                                                                               | 7         |
| 4Co/Al <sub>2</sub> O <sub>3</sub>   | LA              | 1,4-dioxane, H <sub>2</sub> (50 bar)   | 180   | 100          | >99               | 0.37                                                                                                | 8         |
| Co/ZrO <sub>2</sub>                  | EL              | 1,4-dioxane, H <sub>2</sub> (40 bar)   | 190   | 100          | 82.5 <sup>c</sup> | 1.5                                                                                                 | this work |
| Co/ZrO <sub>2</sub>                  | EL              | 1,4-dioxane, H <sub>2</sub> (40 bar)   | 190   | 100          | 94.3 <sup>d</sup> | 0.87                                                                                                | this work |

<sup>a</sup> Calculated from literature data by using the active metal mass in a given catalyst. <sup>b</sup> ML is methyl levulinate. <sup>c</sup> The reaction time is 1 h. <sup>d</sup> The 12th recycle with regeneration of the catalyst by calcining at 550 °C for 2 h in air and reducing 500 °C for 2 h after four recycles (No. 12 in Fig. 4).

## References

1. M. G. Al-Shaal, W. R. H. Wright and R. Palkovits, *Green Chem.*, 2012, **14**, 1260-1263.
2. F. Ye, D. Zhang, T. Xue, Y. Wang and Y. Guan, *Green Chem.*, 2014, **16**, 3951-3957.
3. Z. Yang, Y. B. Huang, Q. X. Guo and Y. Fu, *Chem. Comm.*, 2013, **49**, 5328-5330.
4. K. Yan and A. C. Chen, *Fuel*, 2014, **115**, 101-108.
5. Q. Xu, X. L. Li, T. Pan, C. G. Yu, J. Deng, Q. X. Guo and Y. Fu, *Green Chem.*, 2016, **18**, 1287-1294.
6. A. M. Hengne and C. V. Rode, *Green Chem.*, 2012, **14**, 1064-1072.
7. H. C. Zhou, J. L. Song, H. L. Fan, B. B. Zhang, Y. Y. Yang, J. Y. Hu, Q. G. Zhu and B. X. Han, *Green Chem.*, 2014, **16**, 3870-3875.
8. X. D. Long, P. Sun, Z. L. Li, R. Lang, C. G. Xia and F. W. Li, *Chinese J. Catal.*, 2015, **36**, 1512-1518.
